# Supplementary material for: Distribution and Restoration of Serotonin-Immunoreactive Paraneuronal Cells During Caudal Fin Regeneration in Zebrafish
Source: PubMed Central journal article supplement (PMC6763699; doi:10.3389/fnmol.2019.00227), 2019-09-19
Supplement: Image_1.pdf [file Image_1.pdf]

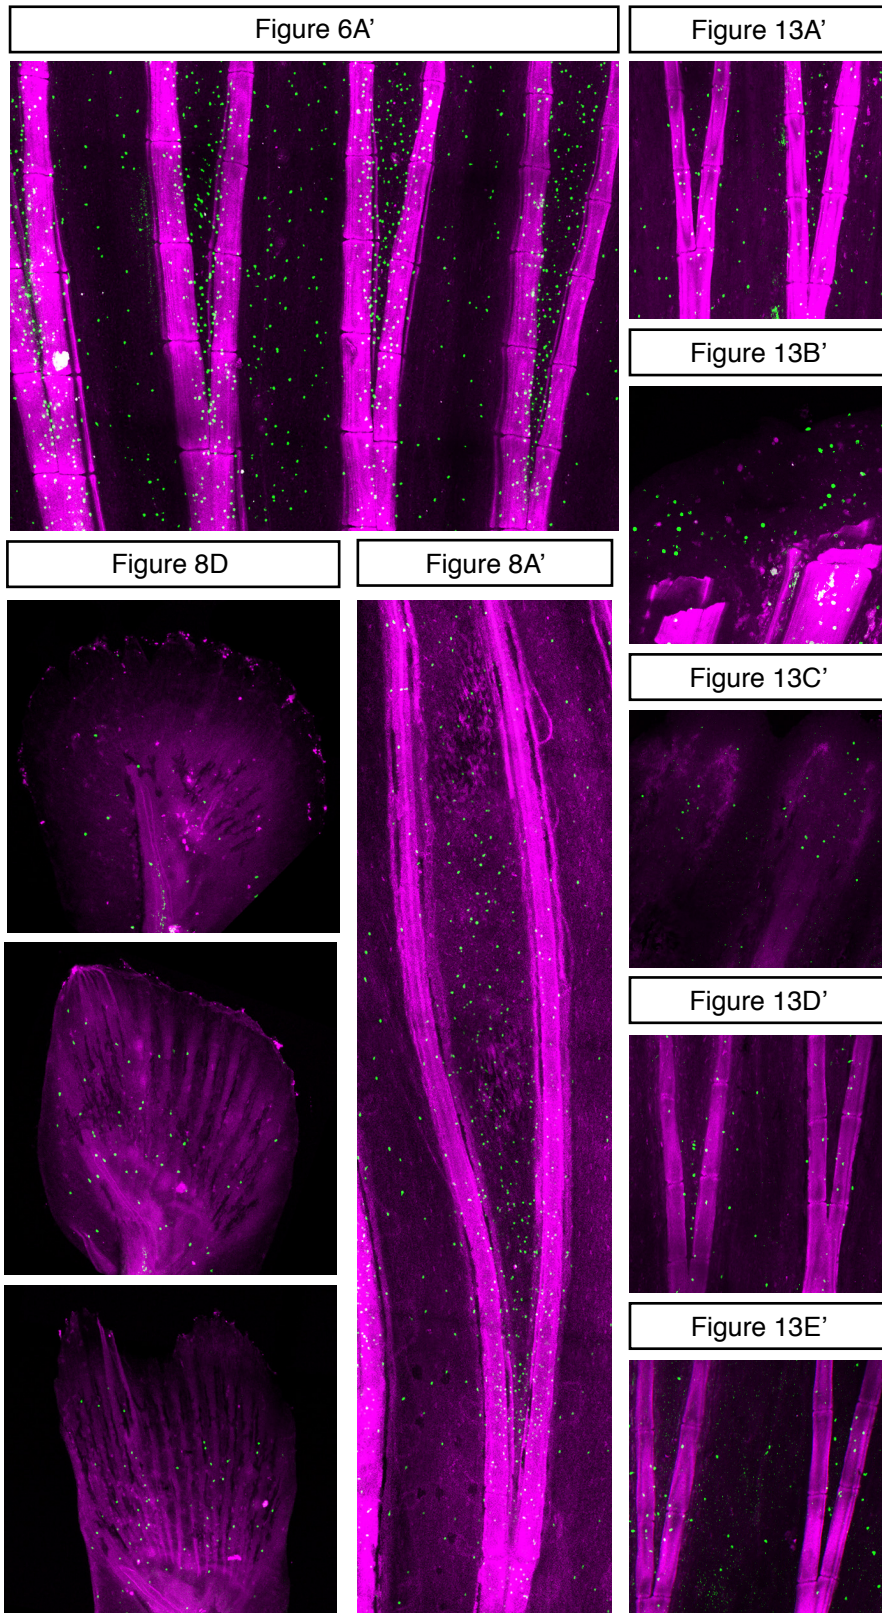

**Supplementary Figure S1. Images of Zooms from main figures without white cell-projection dots.**

The corresponding main figures are indicated above the image. Tissue Autofluorescence in pink. Serotonin-positive cells in green.
